# Supplementary material for: Autothermal Reforming of Acetic Acid to Hydrogen and Syngas on Ni and Rh Catalysts
Source: MDPI journal article supplement (doi:10.3390/catal11121504), 2021-12-10
Supplement: s1 [file s1]

## Supplementary Materials

### Autothermal reforming of acetic acid to hydrogen and syngas on Ni and Rh catalysts

Lifita N. Tande, Erik G. Resendiz Mora, Valerie Dupont and Martyn V. Twigg

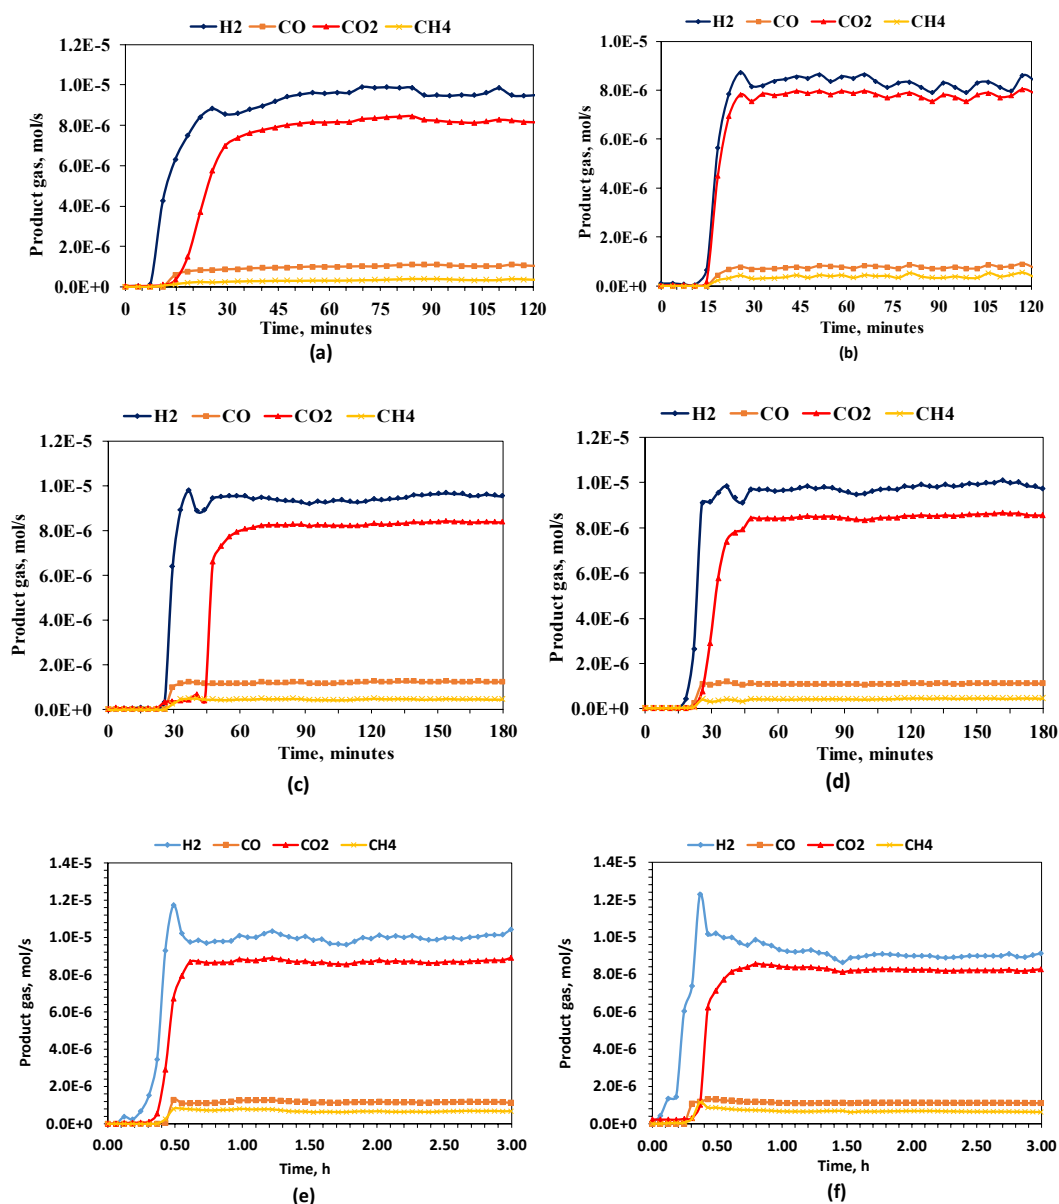

Figure 1. Dry N<sub>2</sub>-free product gas flow composition with time on stream obtained during ATR of acetic acid flowing at 1 ml/h, S/C = 2,  $\lambda = 0.353$  (Air flow = 22 ml/min), hot product gas at 570 °C and 1 bar. (a) Fresh Ni-Al. (b) Reduced Ni-Al. (c) Fresh Ni-CaAl. (d) Reduced Ni-CaAl, (e) Fresh Rh-Al, (f) Reduced Rh-Al.

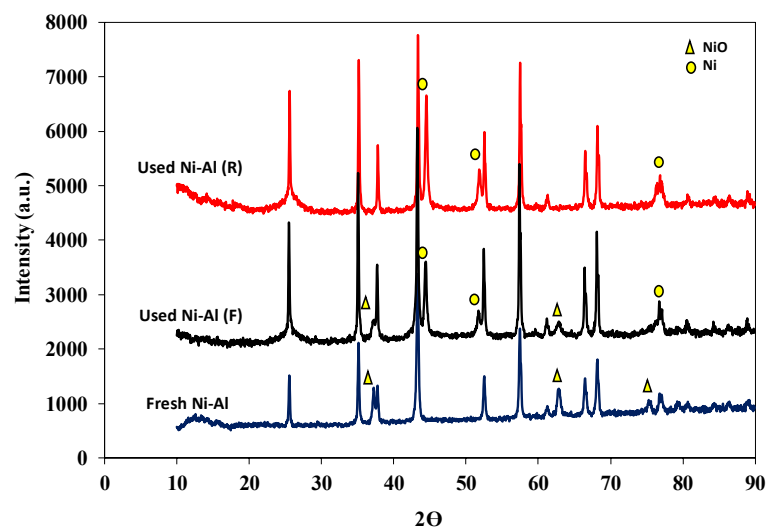

(a)

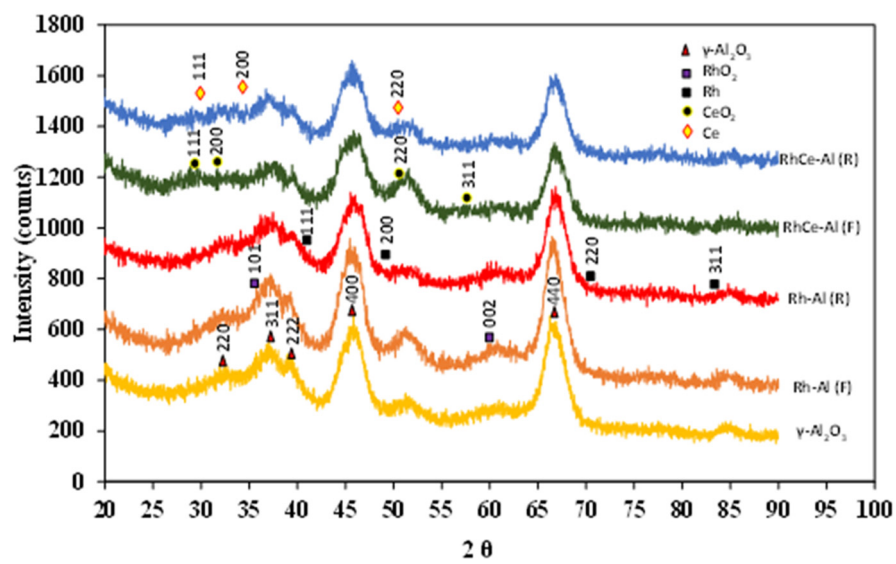

(b)

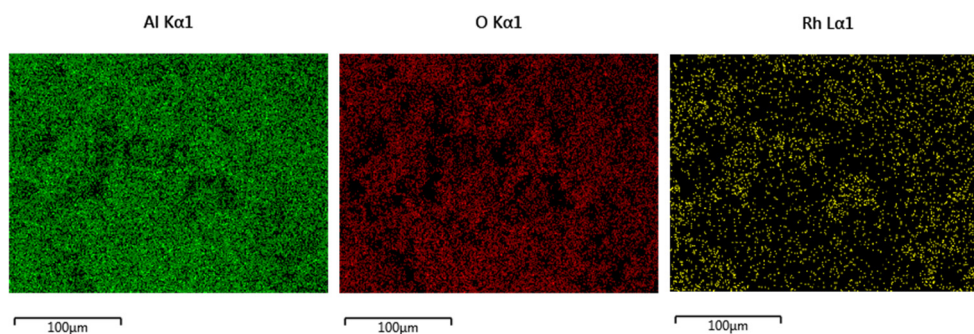

(c)

Figure S2 XRD patterns of (a) unused fresh Ni-Al, used Ni-Al (used Ni-Al (F)) and used reduced Ni-Al (used Ni-Al (R)). Unlabelled peaks belong to the  $\alpha$ -Al<sub>2</sub>O<sub>3</sub> support, Ni-CaAl XRD are not shown due to large amorphous content (b) Rh-Al fresh (F) in orange and reduced Rh-Al (F) catalyst in red compared to the rhodium-free  $\gamma$ -Al<sub>2</sub>O<sub>3</sub> support in yellow. (c) Elemental mapping of Rh-Al showing good dispersion of Rh.

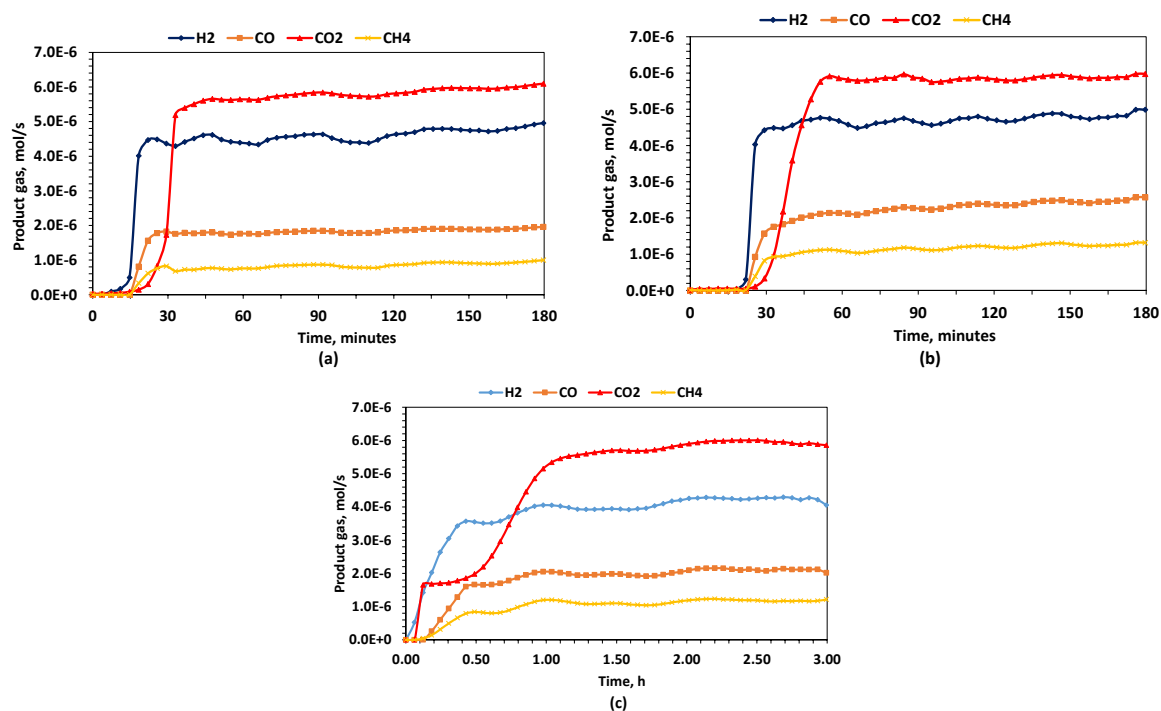

Figure S3 a-c Dry N<sub>2</sub>-free molar flow product gas profiles with time on stream obtained for POX of acetic acid flowing at 1 ml/h,  $\lambda = 0.353$  (Air flow = 22 ml/min), 570 °C and 1 bar. (a) Fresh Ni-Al (b) Fresh Ni-CaAl, (c) Fresh Rh-Al.

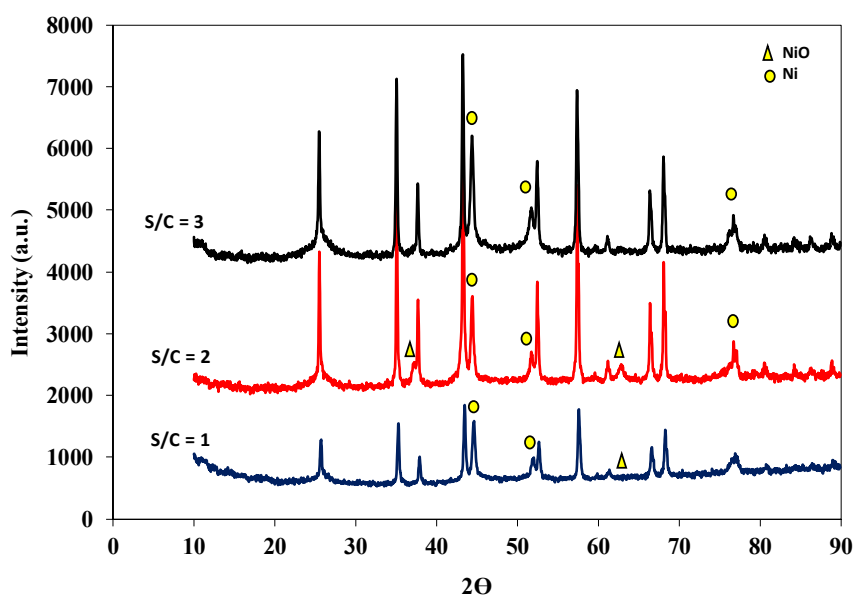

Figure S4 XRD patterns of Ni-Al catalyst for experiments performed using fresh catalyst at S/C 1, 2 and 3 and 1 bar. Acetic acid flow, 1 ml/h, with corresponding  $\lambda$  and temperature values of (0.340, 610 °C), (0.353, 570 °C) and (0.374, 545 °C). All unlabelled peaks belong to the  $\alpha$ -Al<sub>2</sub>O<sub>3</sub> support.

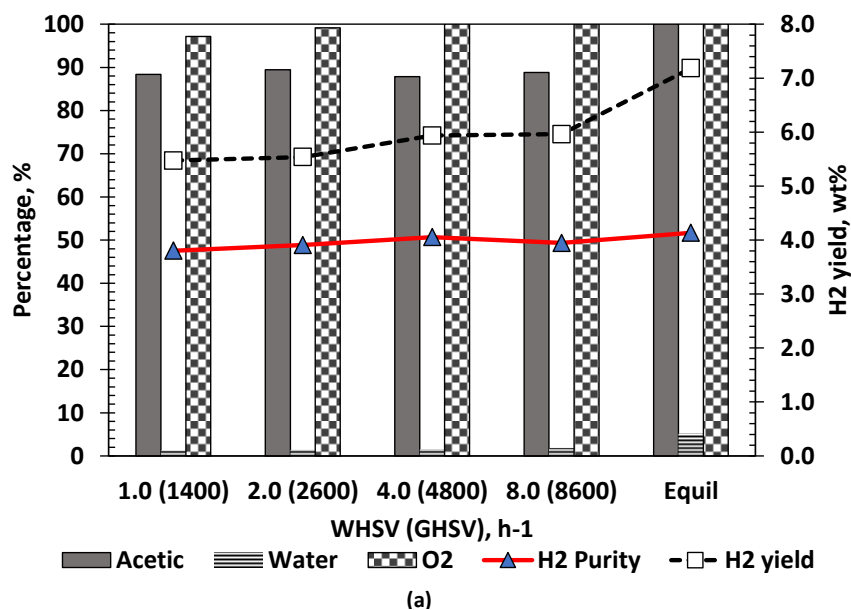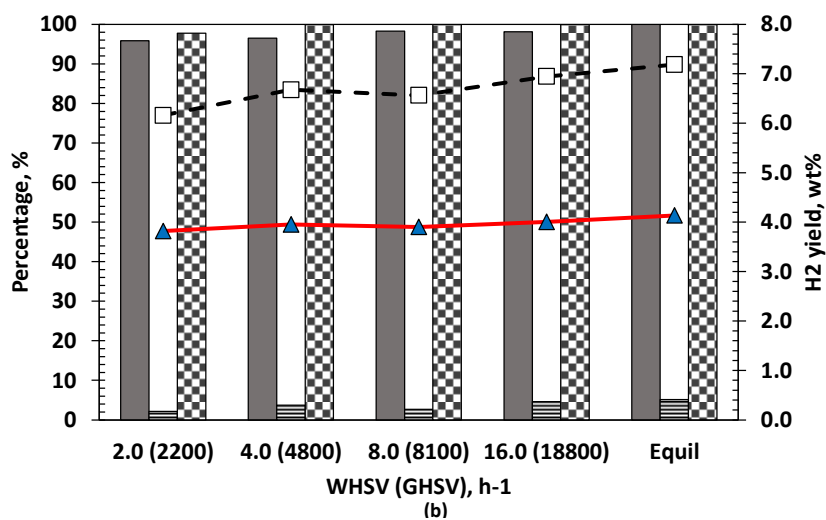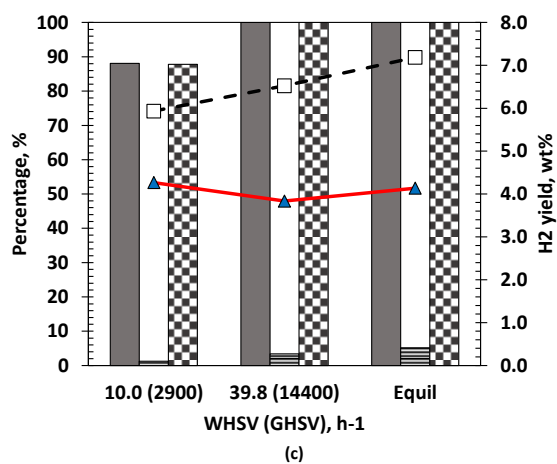

Figure S5 H<sub>2</sub> purity, H<sub>2</sub> yield, and conversion of acetic acid, water and oxygen with WHSV (GHSV) for the (a) Ni-Al, (b) Ni-CaAl and (c) Rh-Al catalysts in packed bed. All flows at S/C = 2 and  $\lambda = 0.353$  corresponding to a reactor exit temperature of 570 °C.

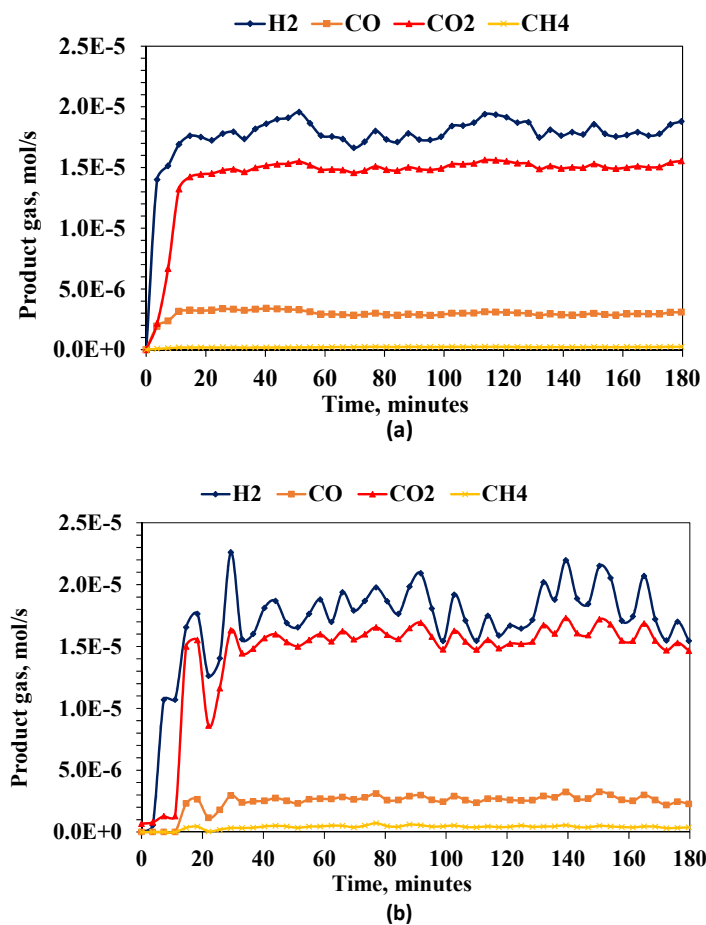

Figure S6 Dry N<sub>2</sub>-free product gas with time on stream obtained during ATR of acetic acid flowing at 2 ml/h, S/C = 2,  $\lambda = 0.353$  (Air flow = 43.3 ml/min), hot product gas at 570 °C and 1 bar. (a) R-M (b) RC-M.
